# Supplementary material for: Spatial regulation of monolignol biosynthesis and laccase genes control developmental and stress-related lignin in flax
Source: PubMed Central journal article supplement (PMC5513022; doi:10.1186/s12870-017-1072-9), 2017-07-14

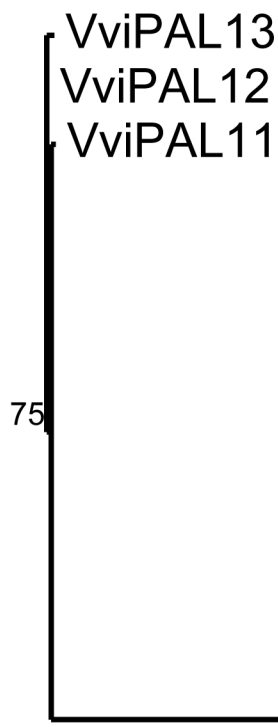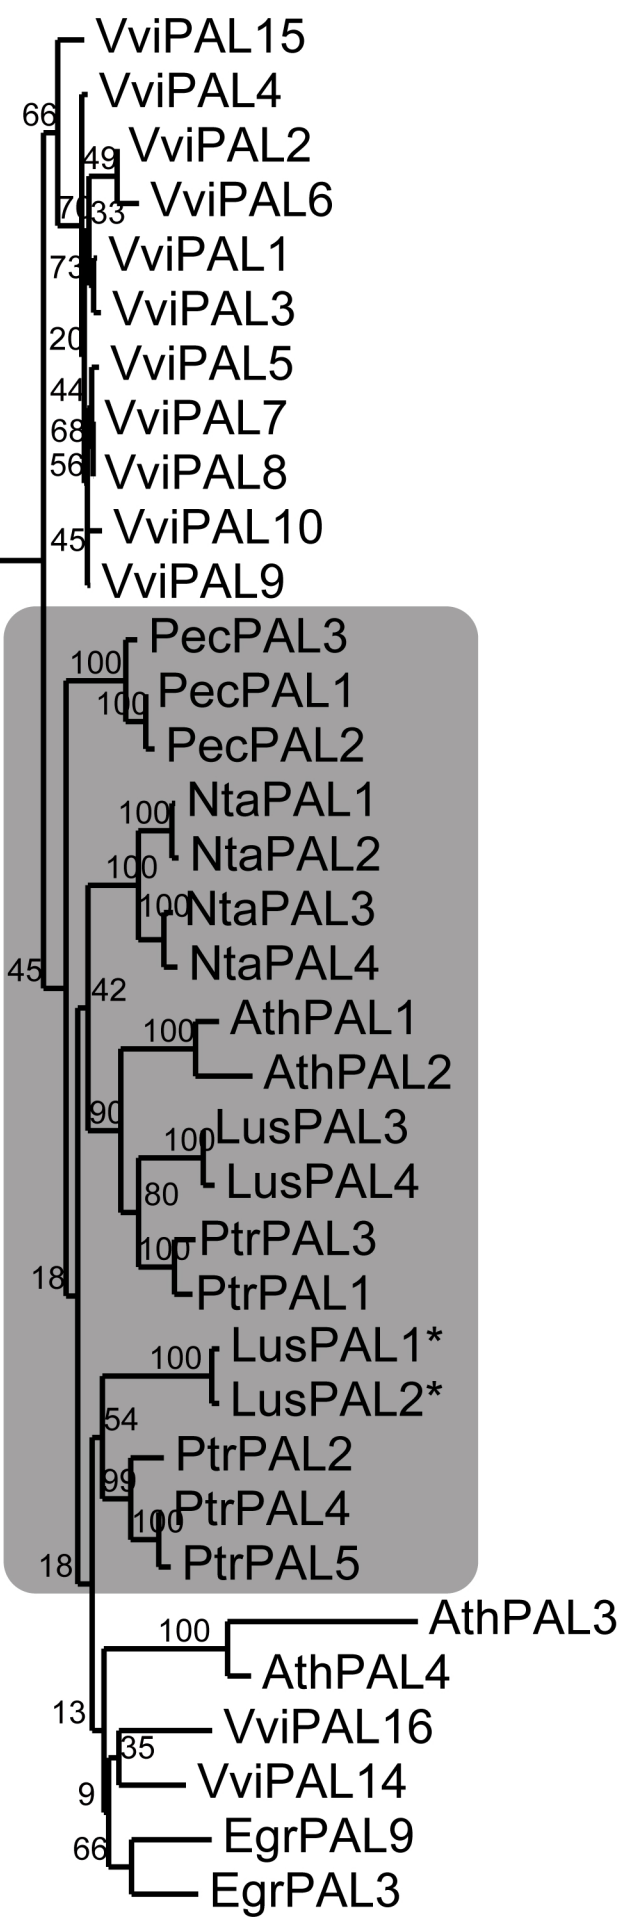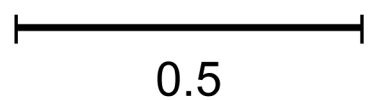

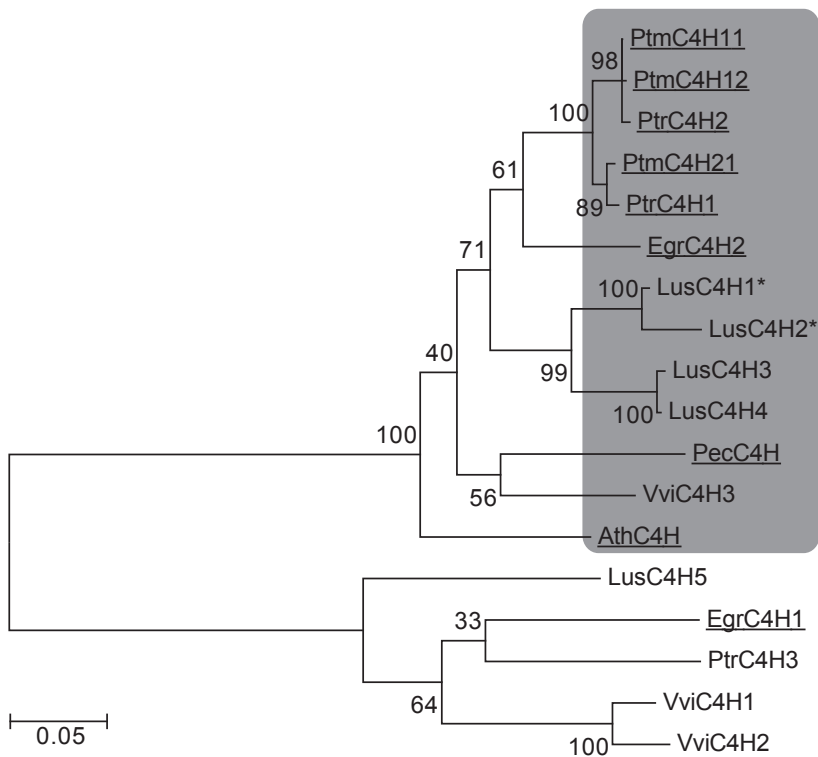

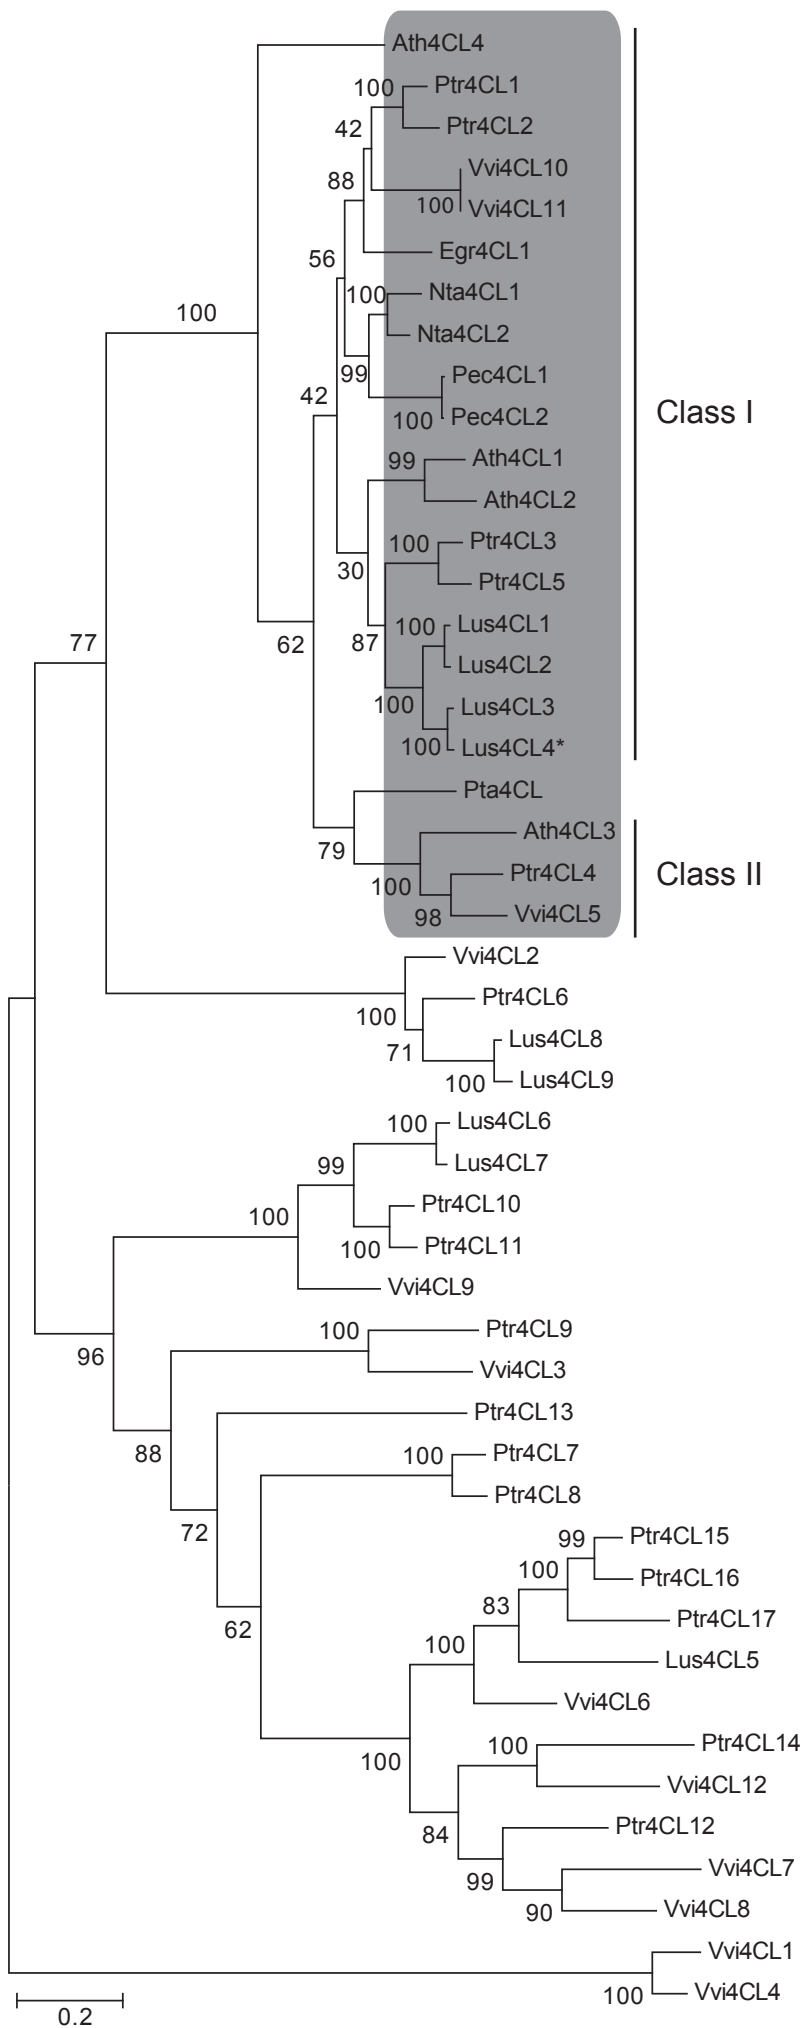

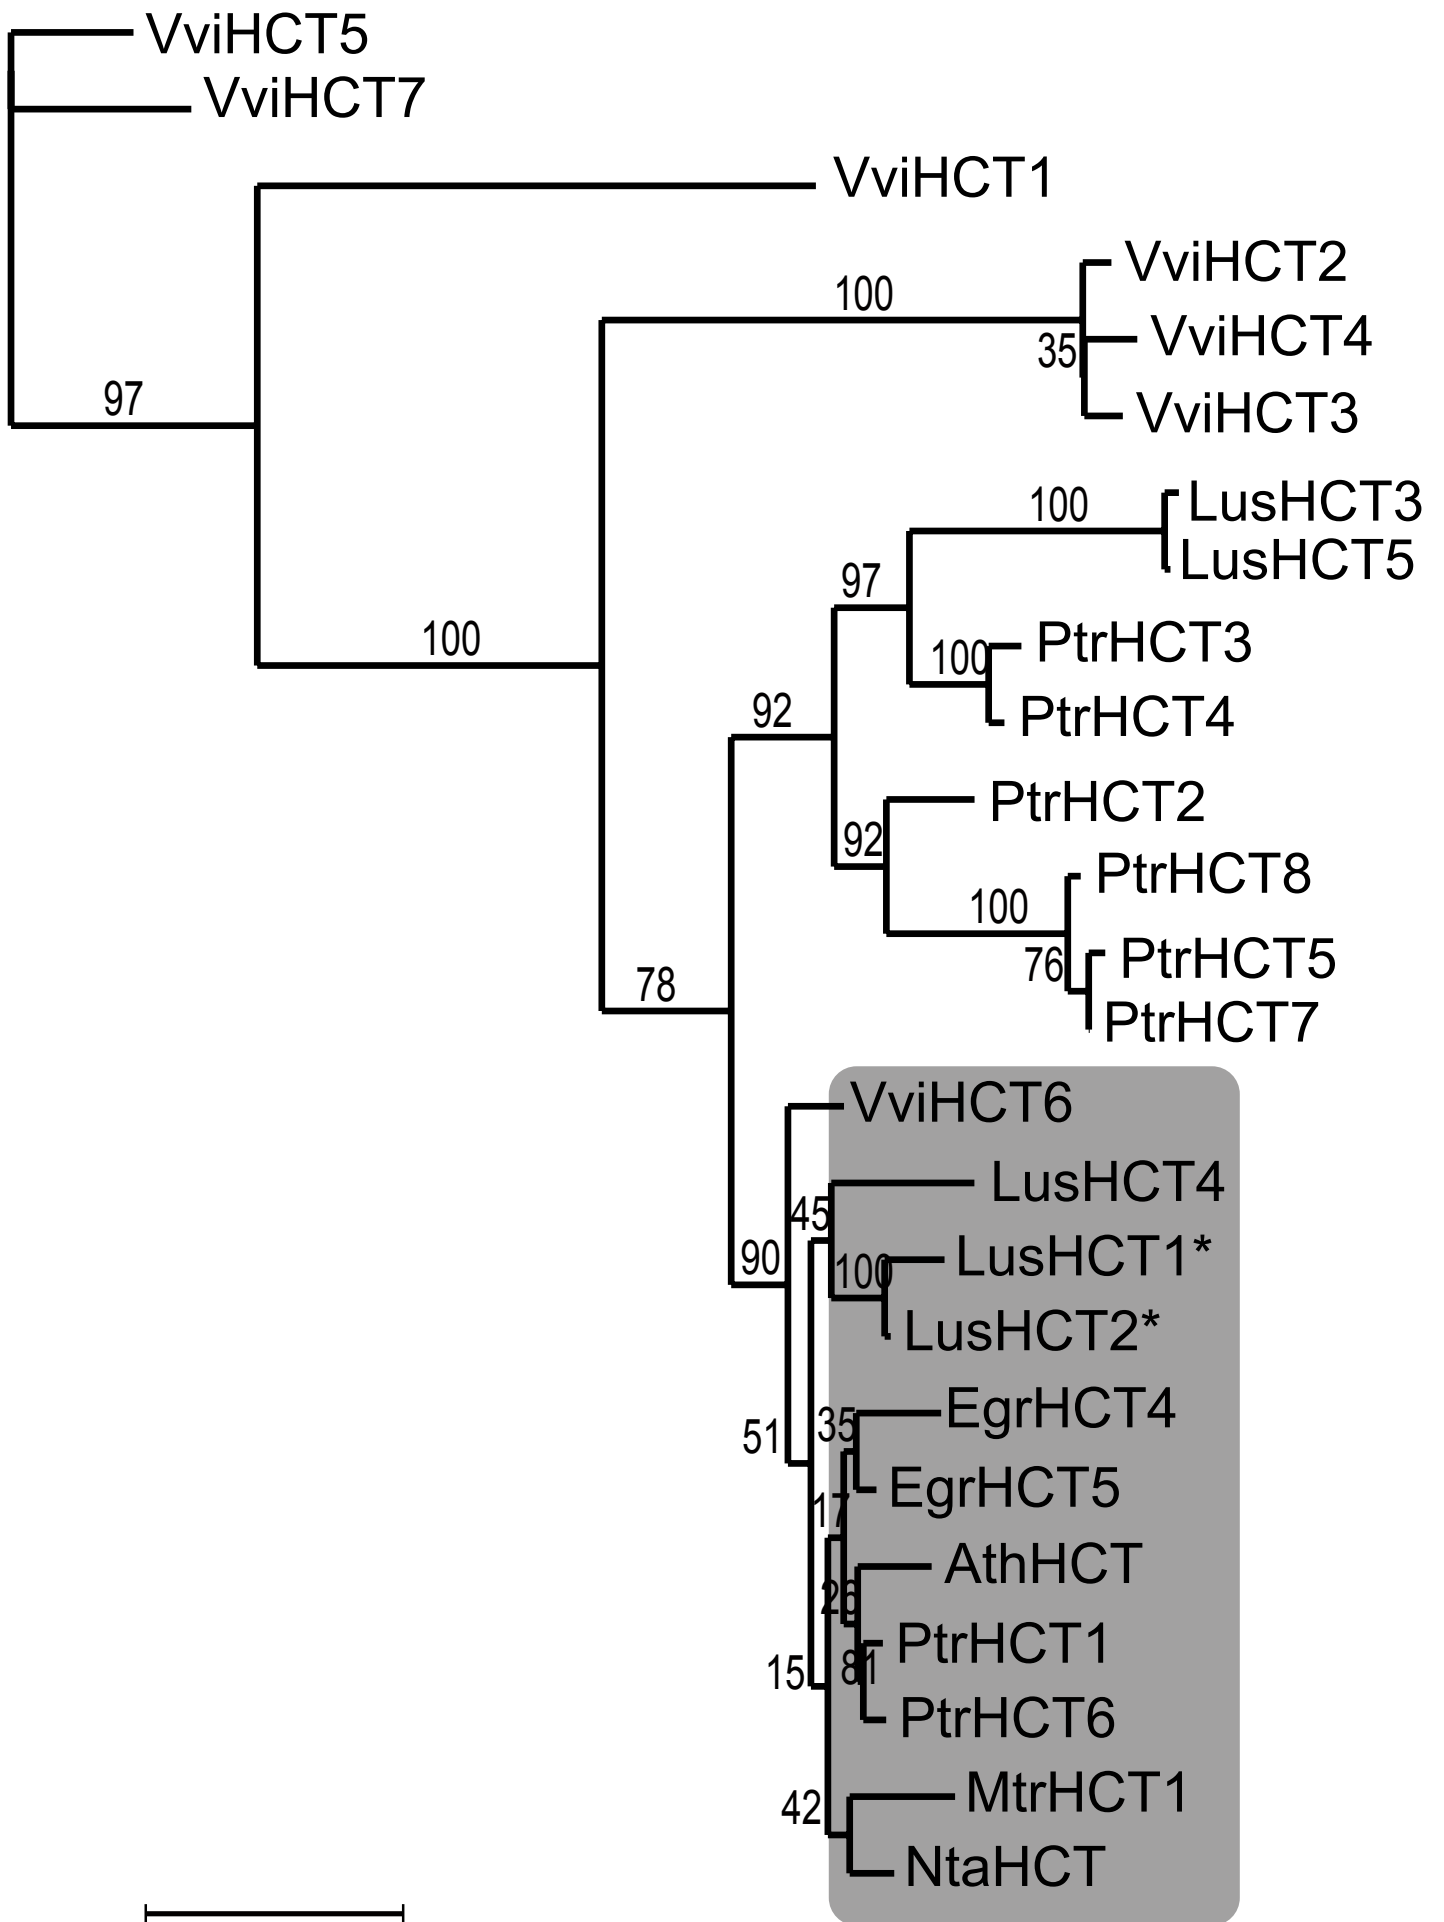

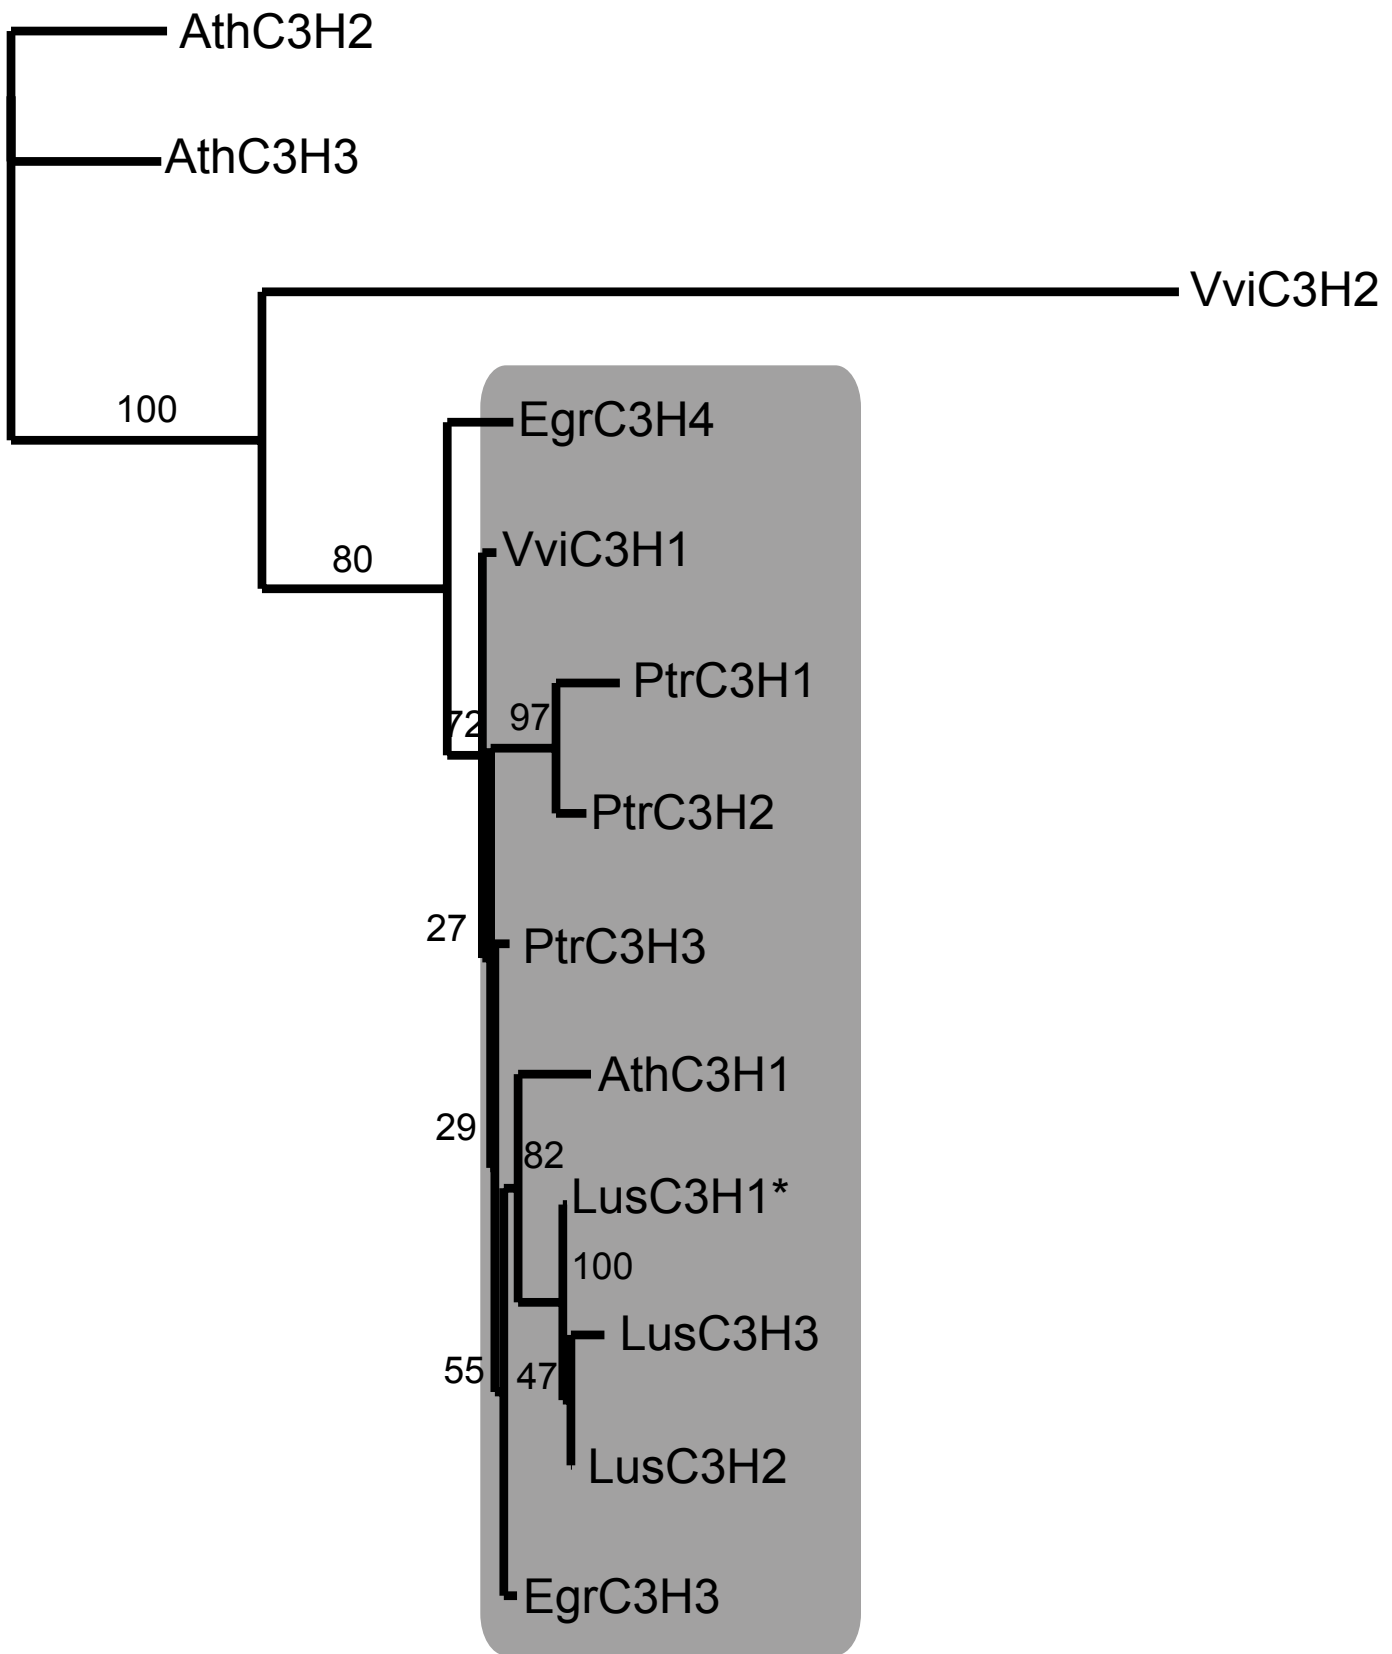

0.6

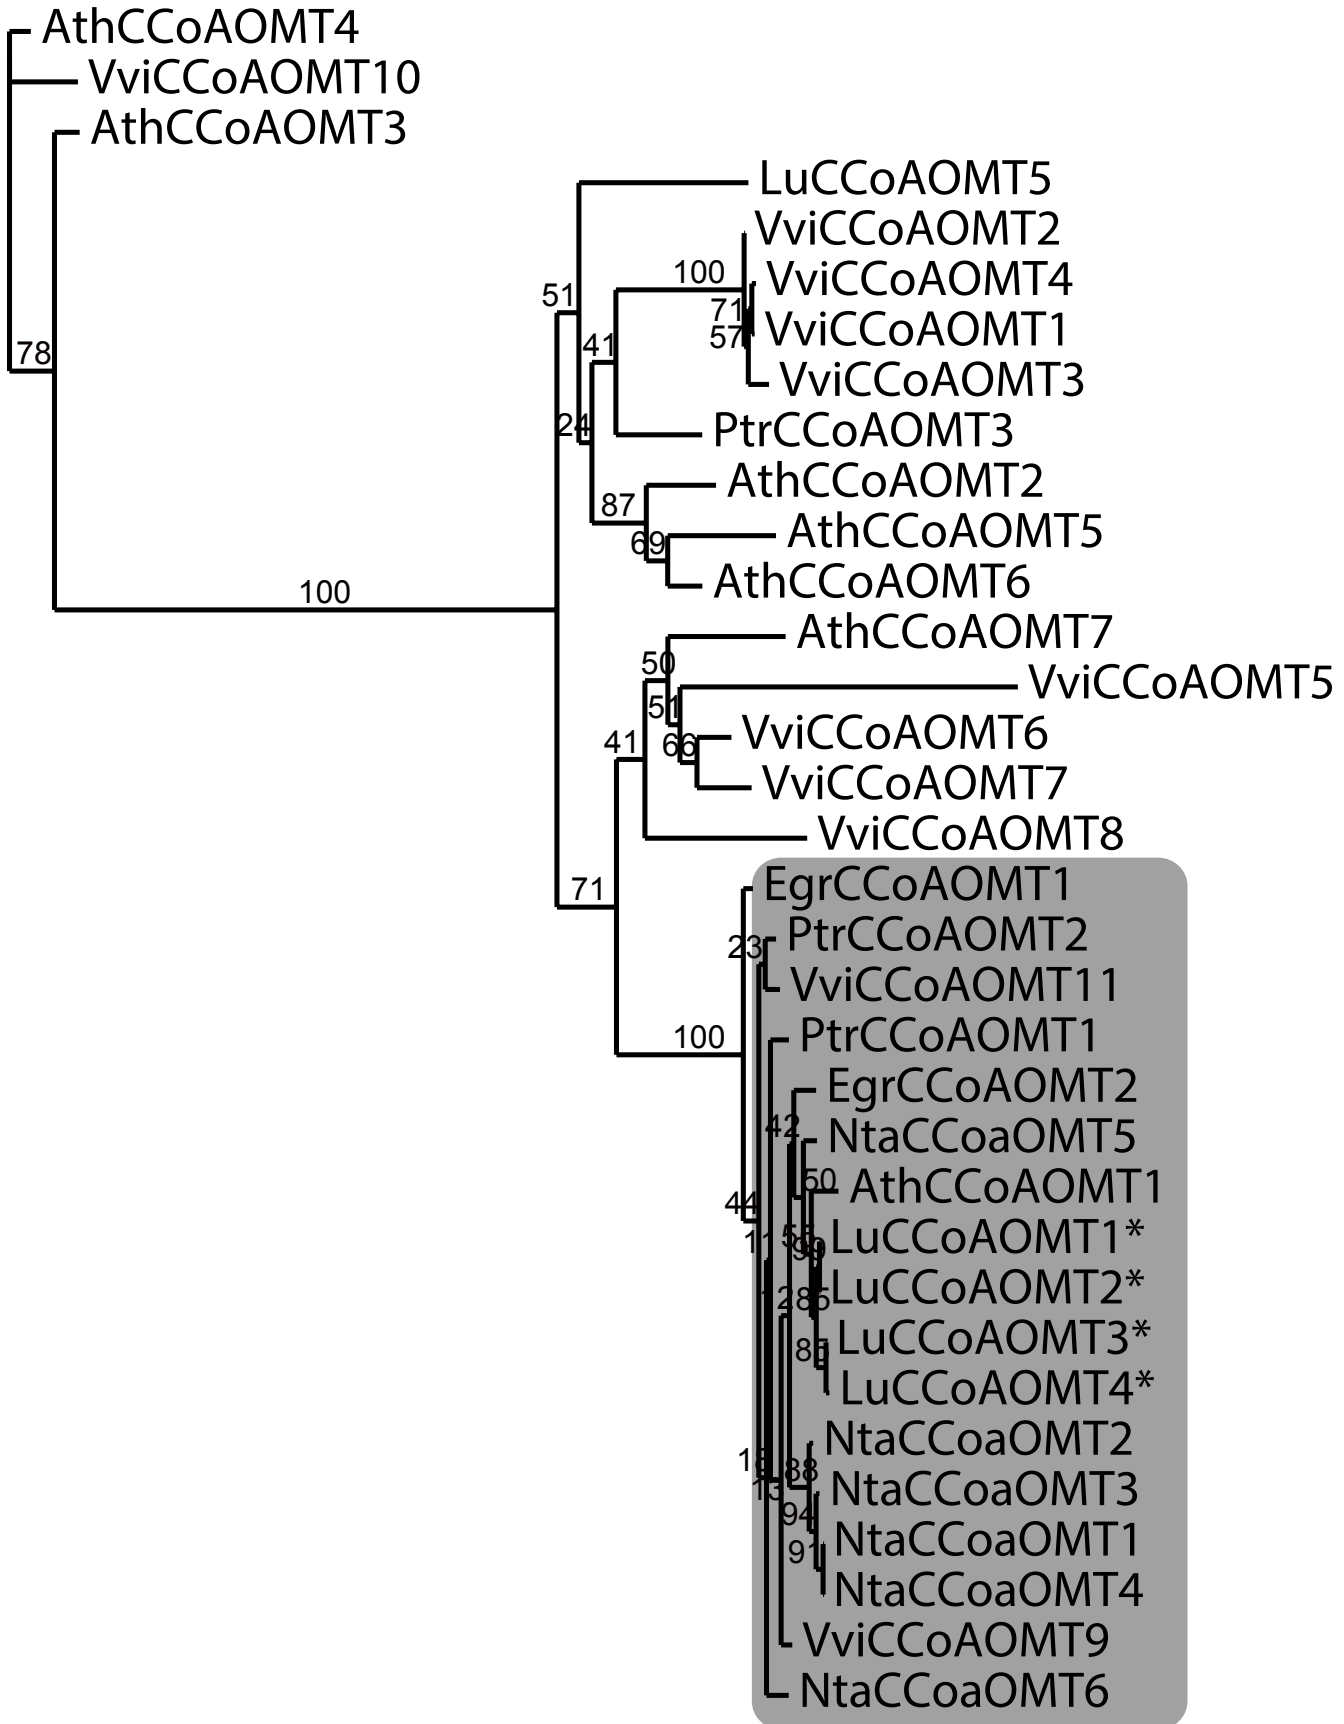

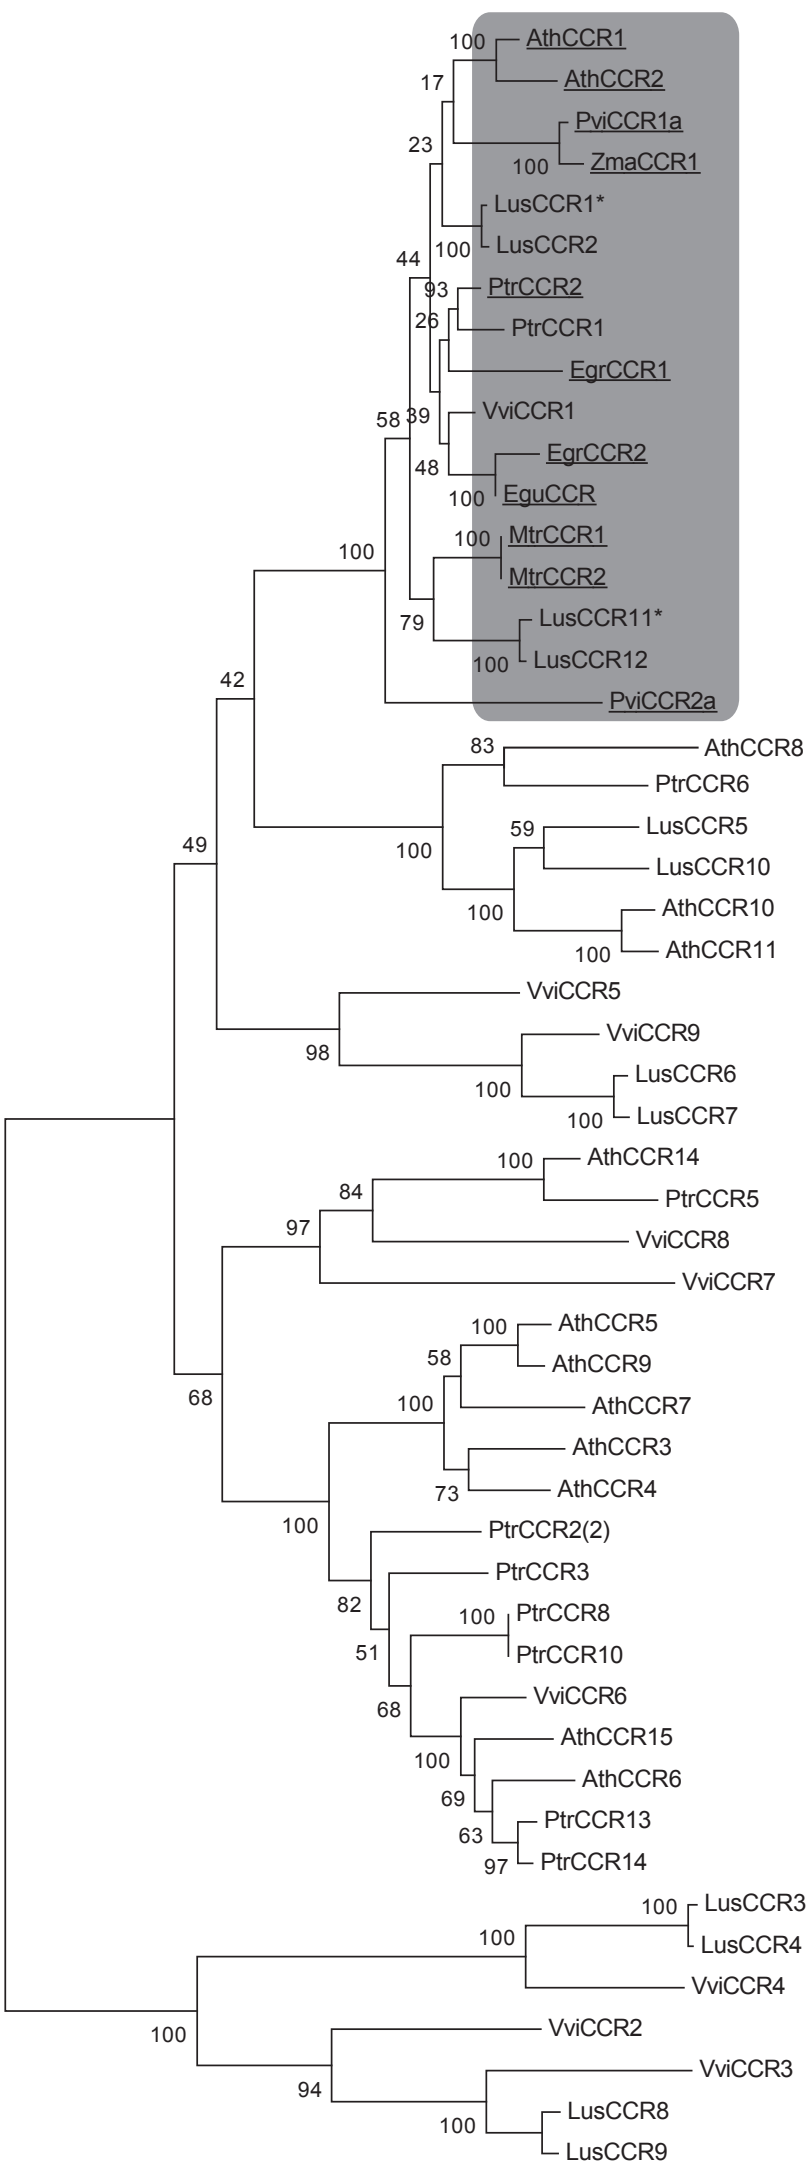

0.2

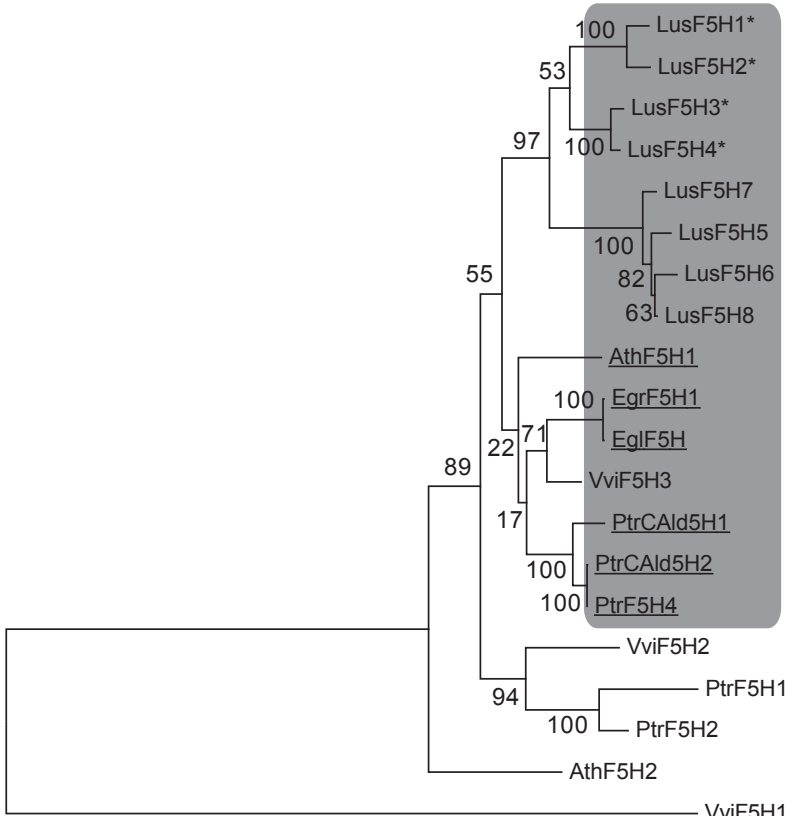

0.2



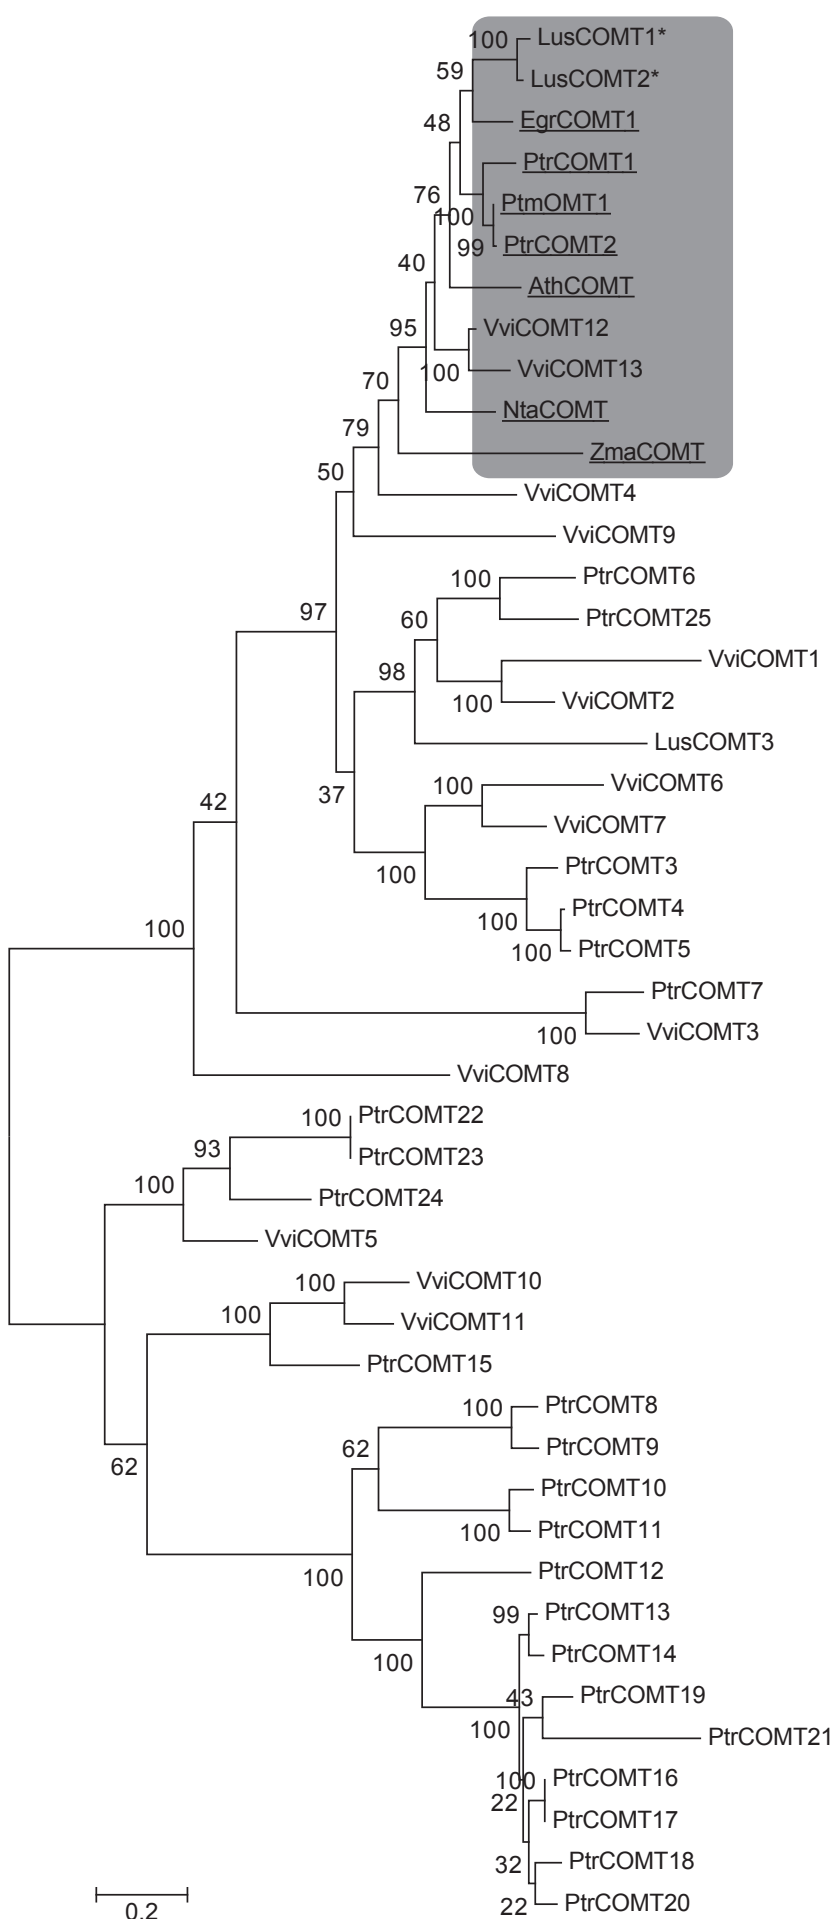

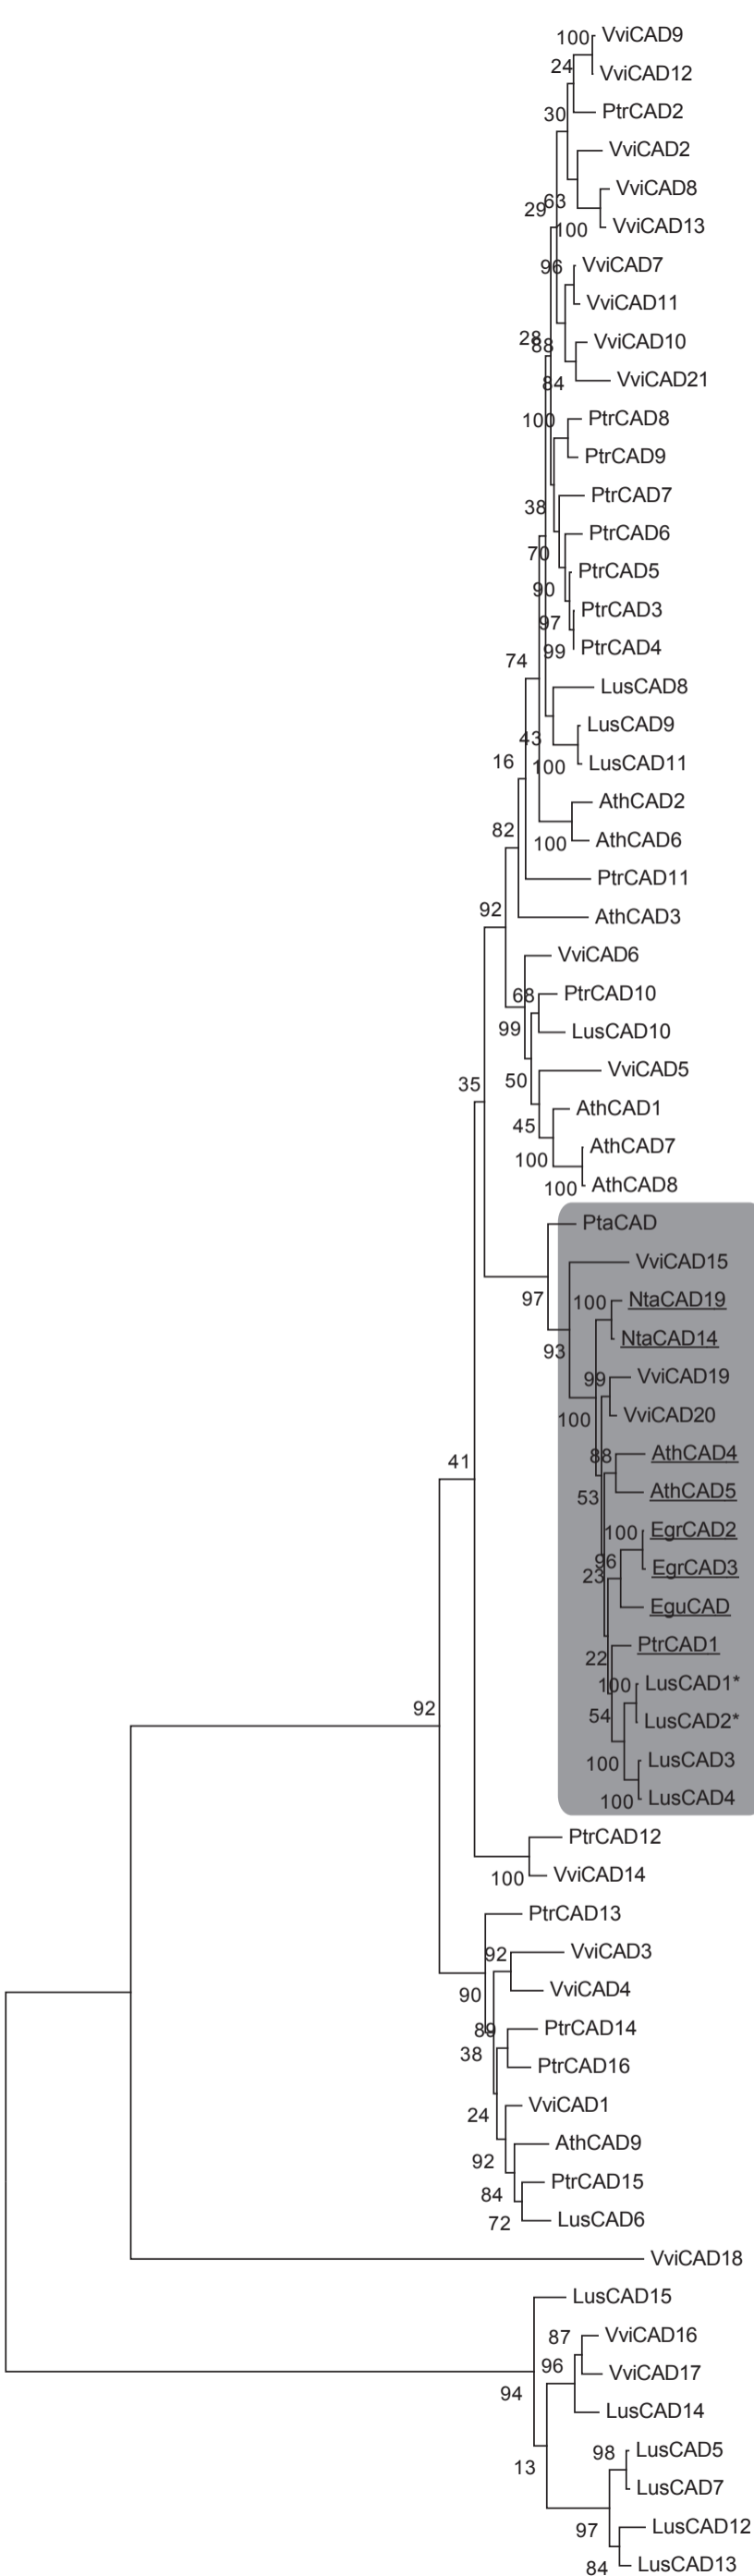

Supplement: 12870_2017_1072_MOESM2_ESM.pdf [file 12870_2017_1072_MOESM2_ESM.pdf]
