# Supplementary material for: Spatial regulation of monolignol biosynthesis and laccase genes control developmental and stress-related lignin in flax
Source: PubMed Central journal article supplement (PMC5513022; doi:10.1186/s12870-017-1072-9), 2017-07-14
Supplement: 12870_2017_1072_MOESM3_ESM.pdf [file 12870_2017_1072_MOESM3_ESM.pdf]

**A**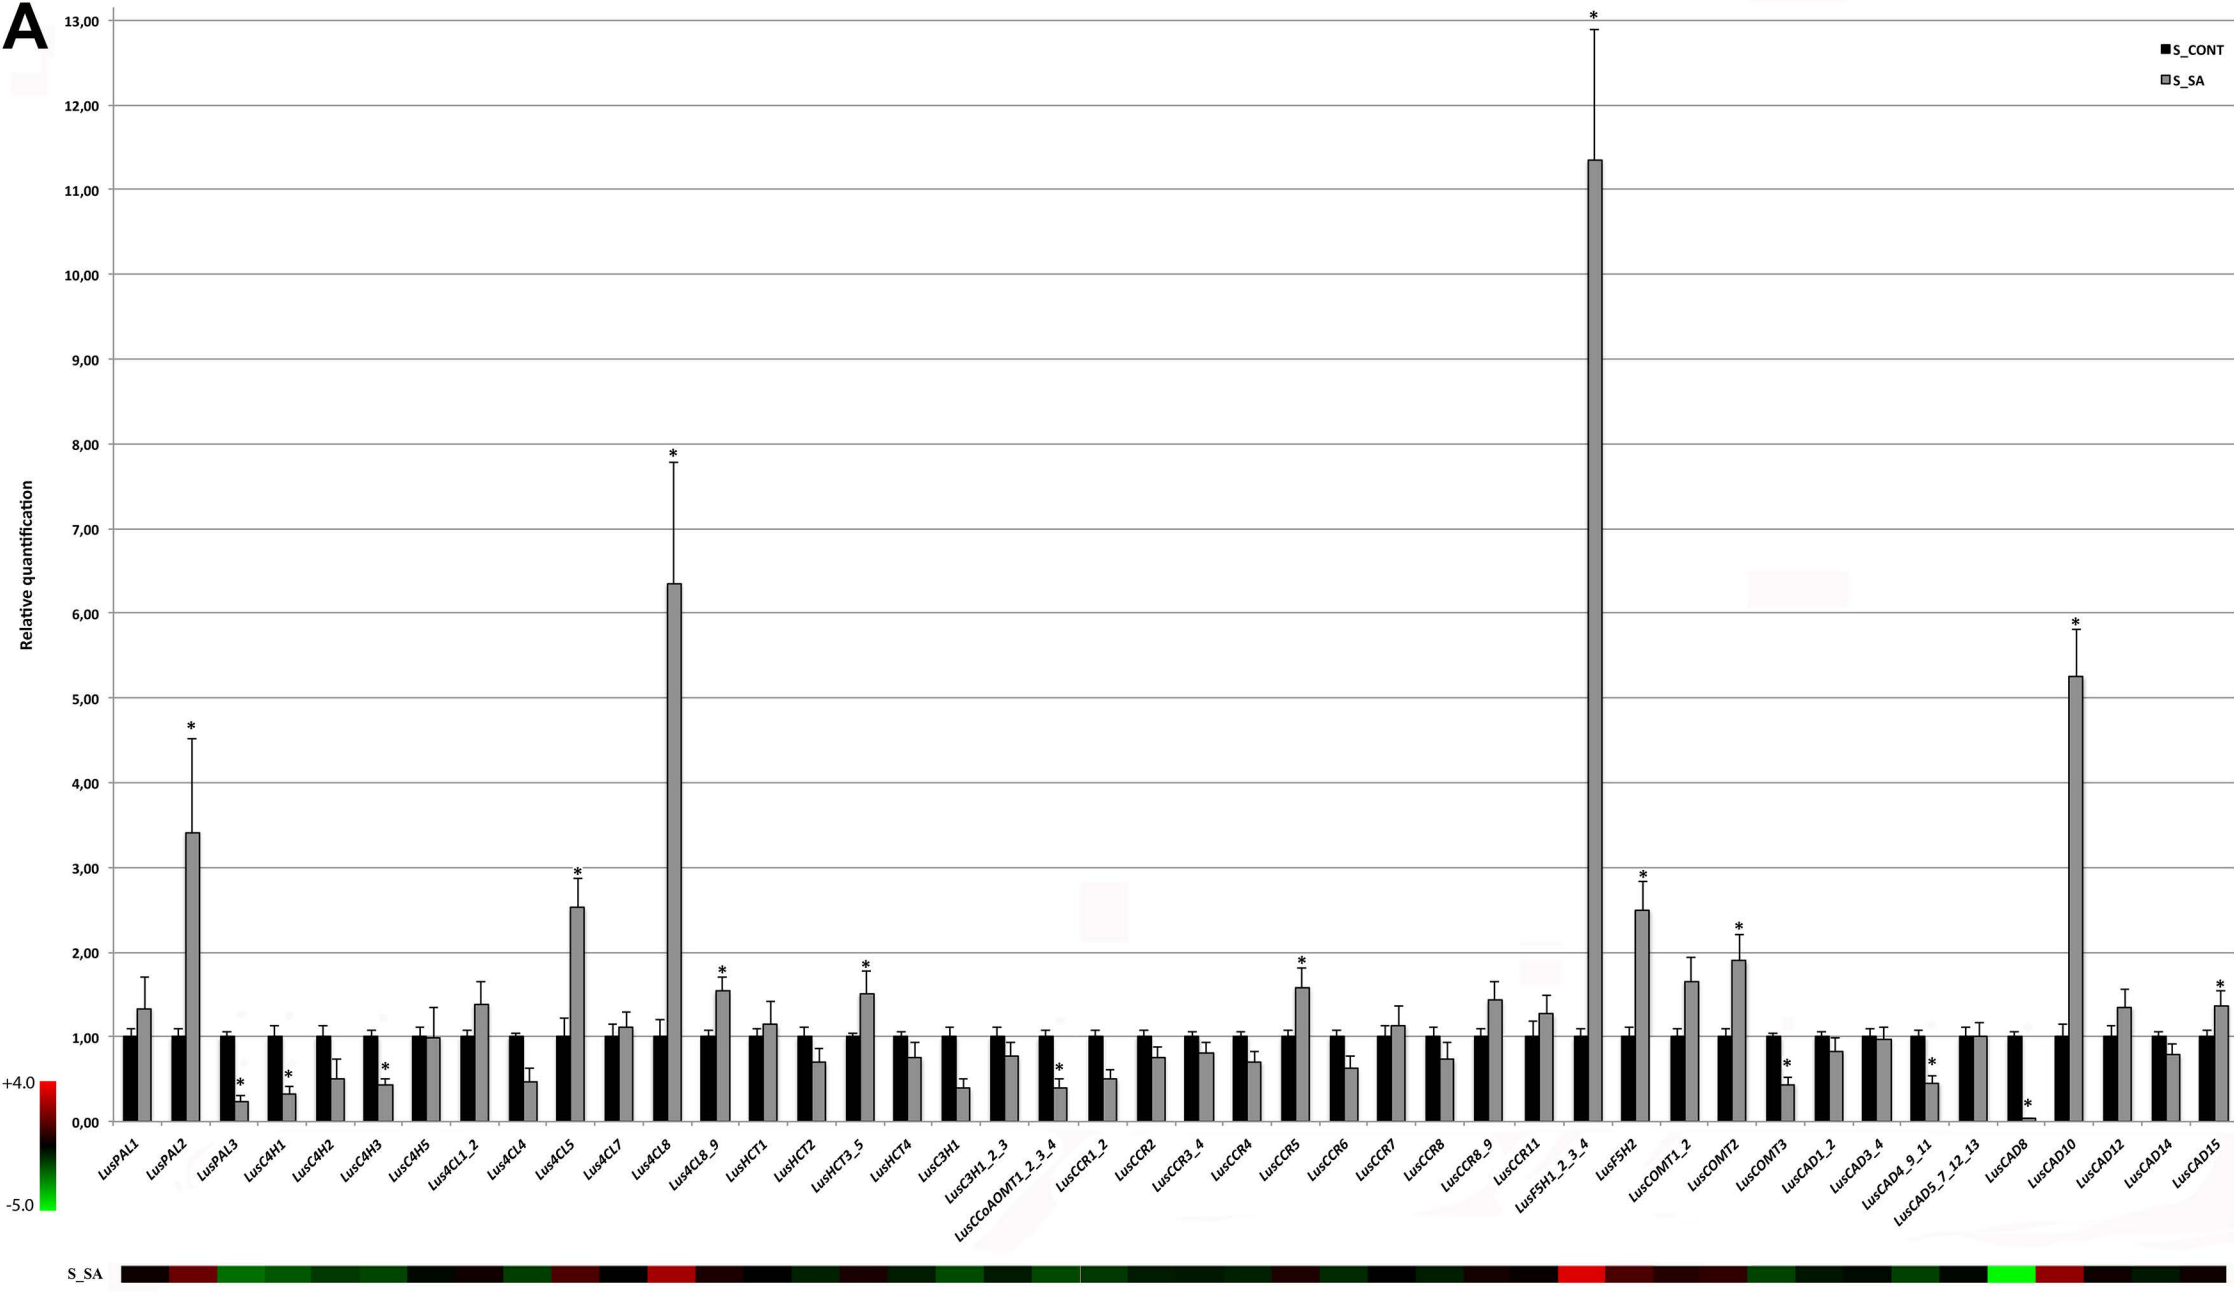

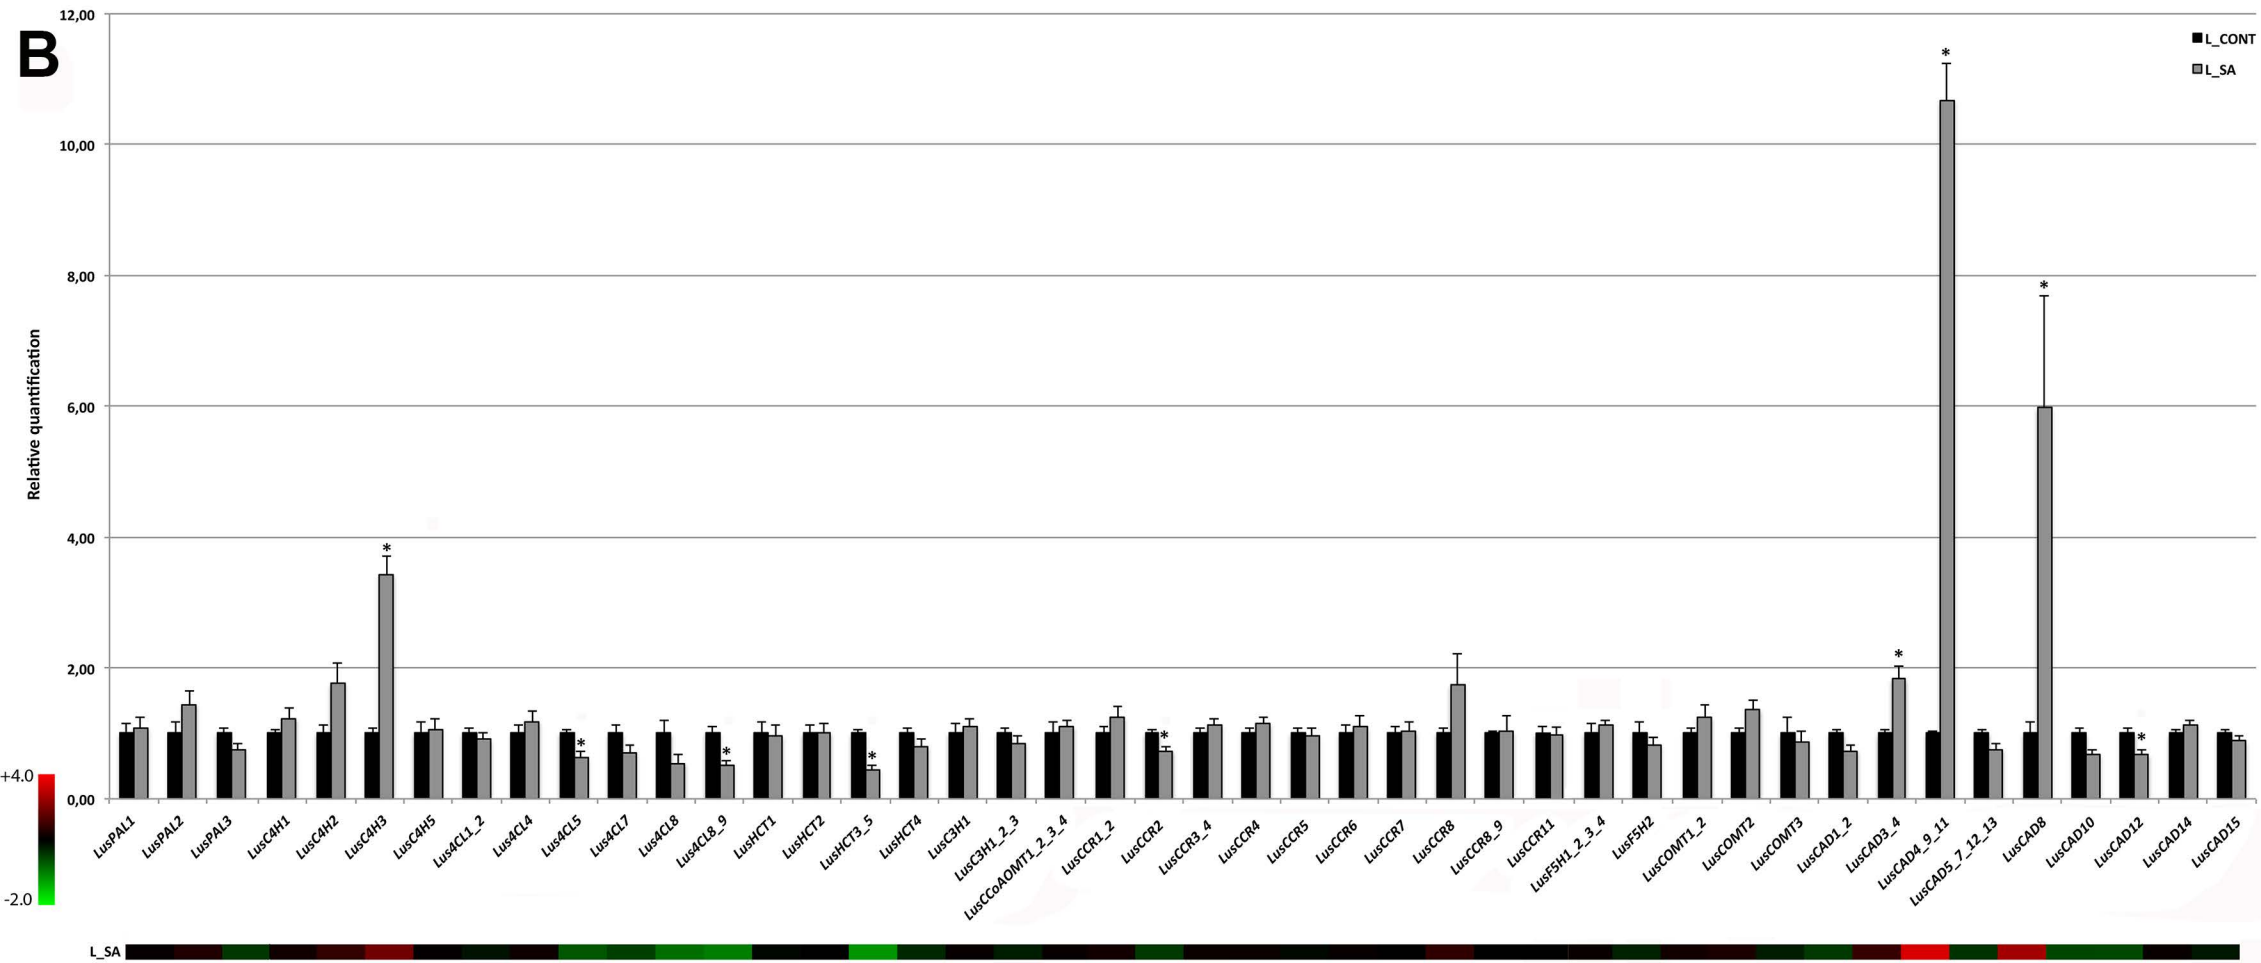

C

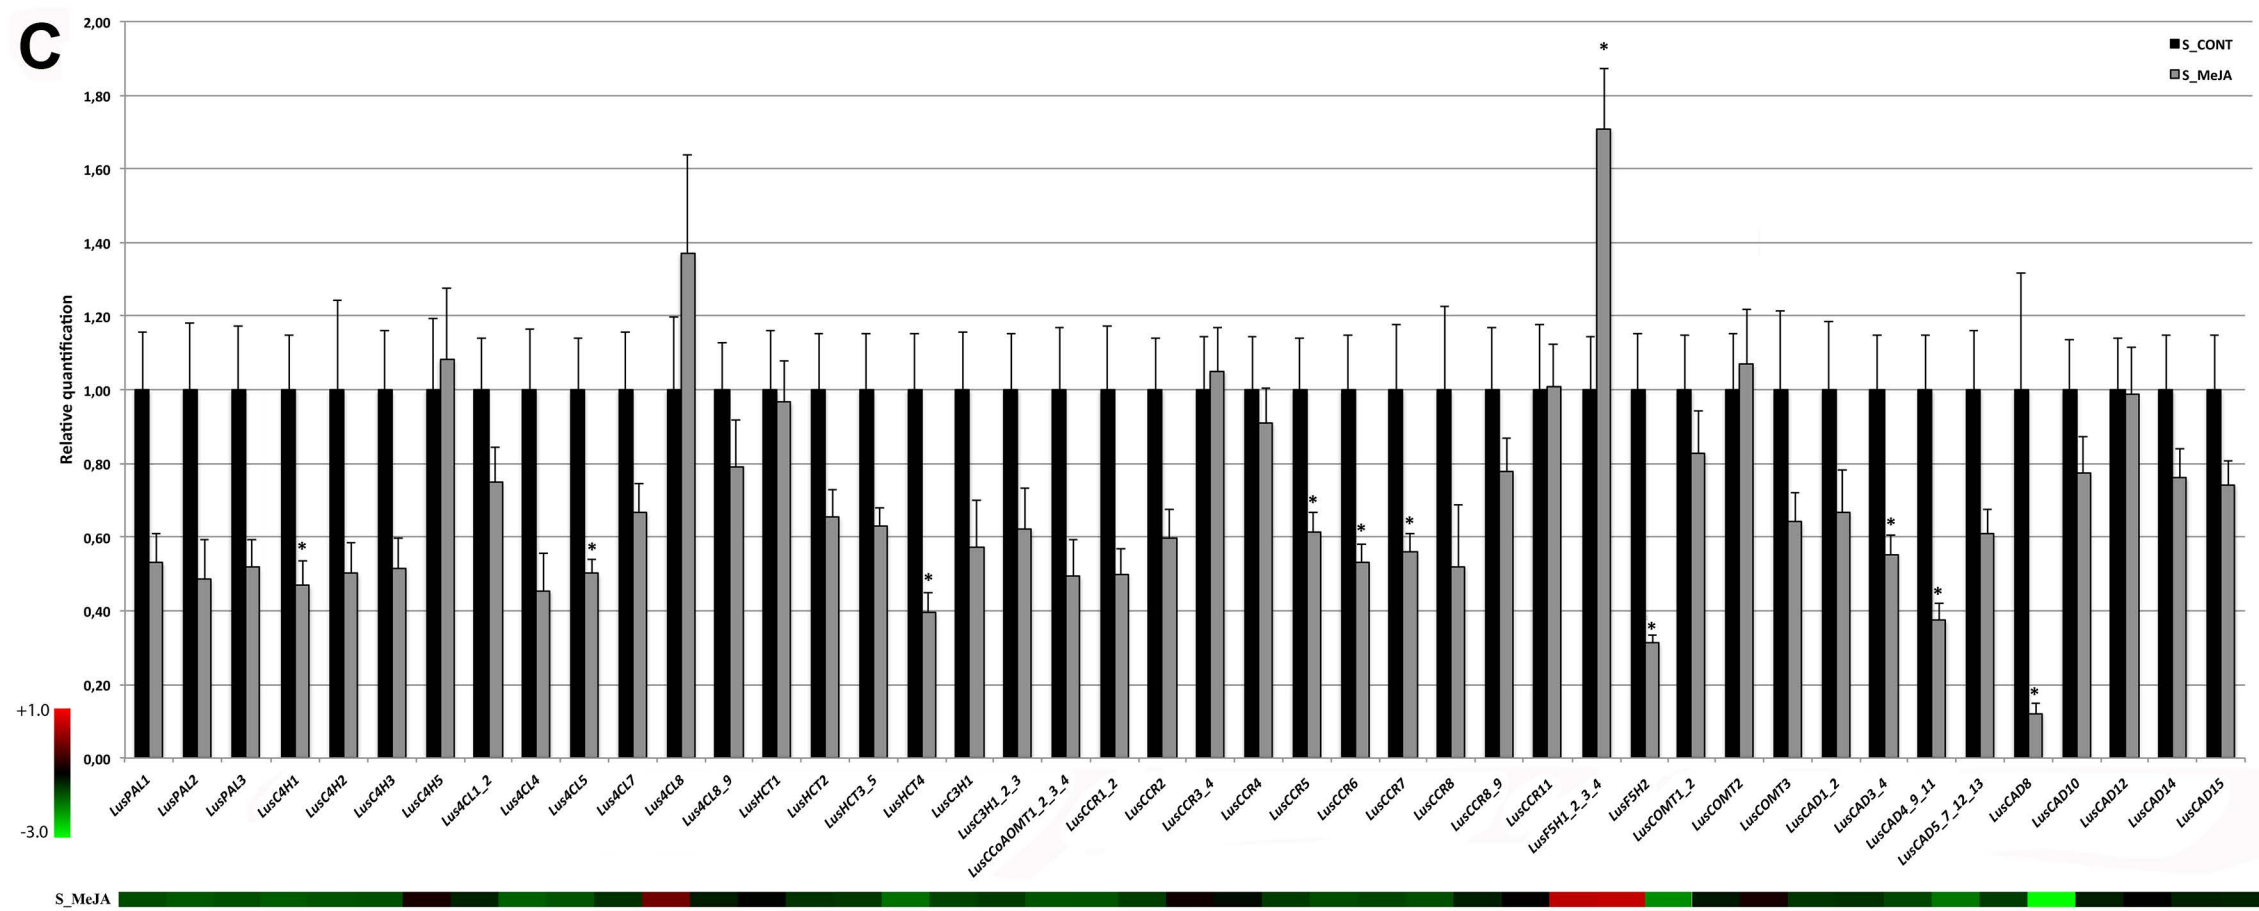

S\_MeJA

**D**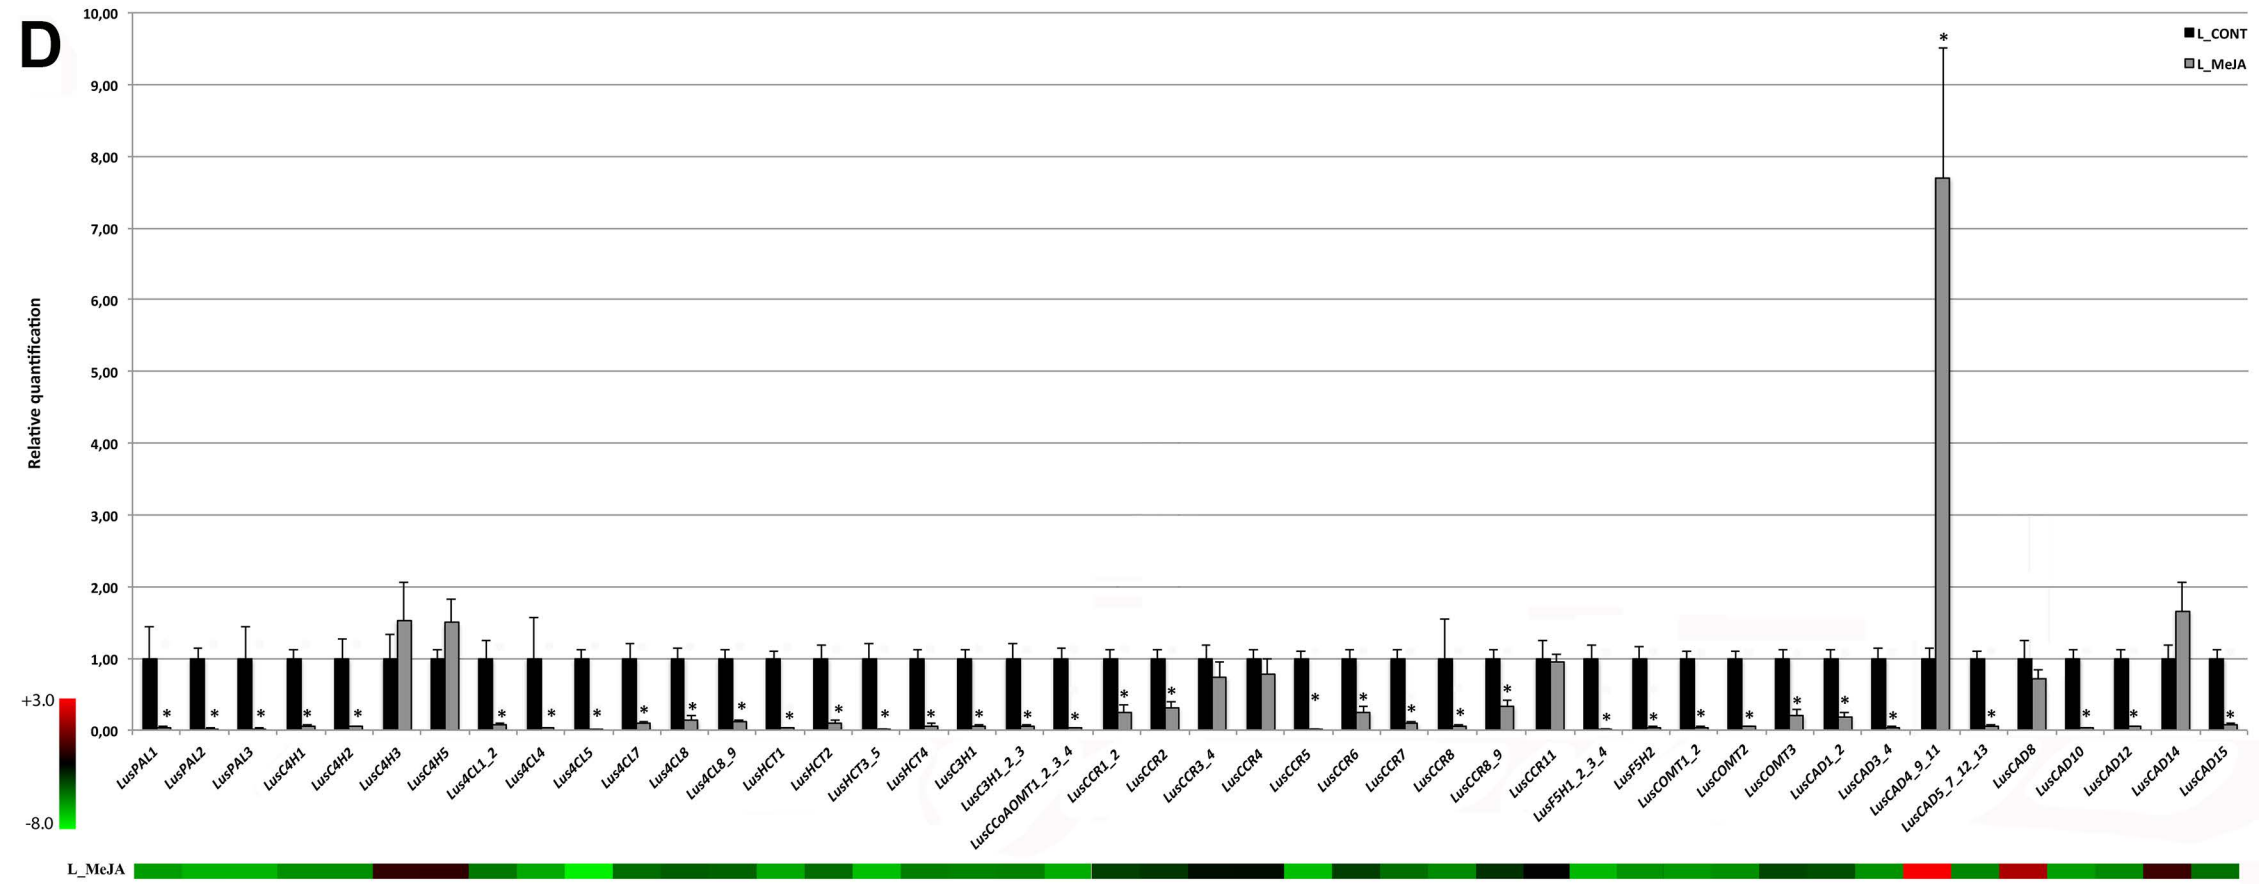

**E**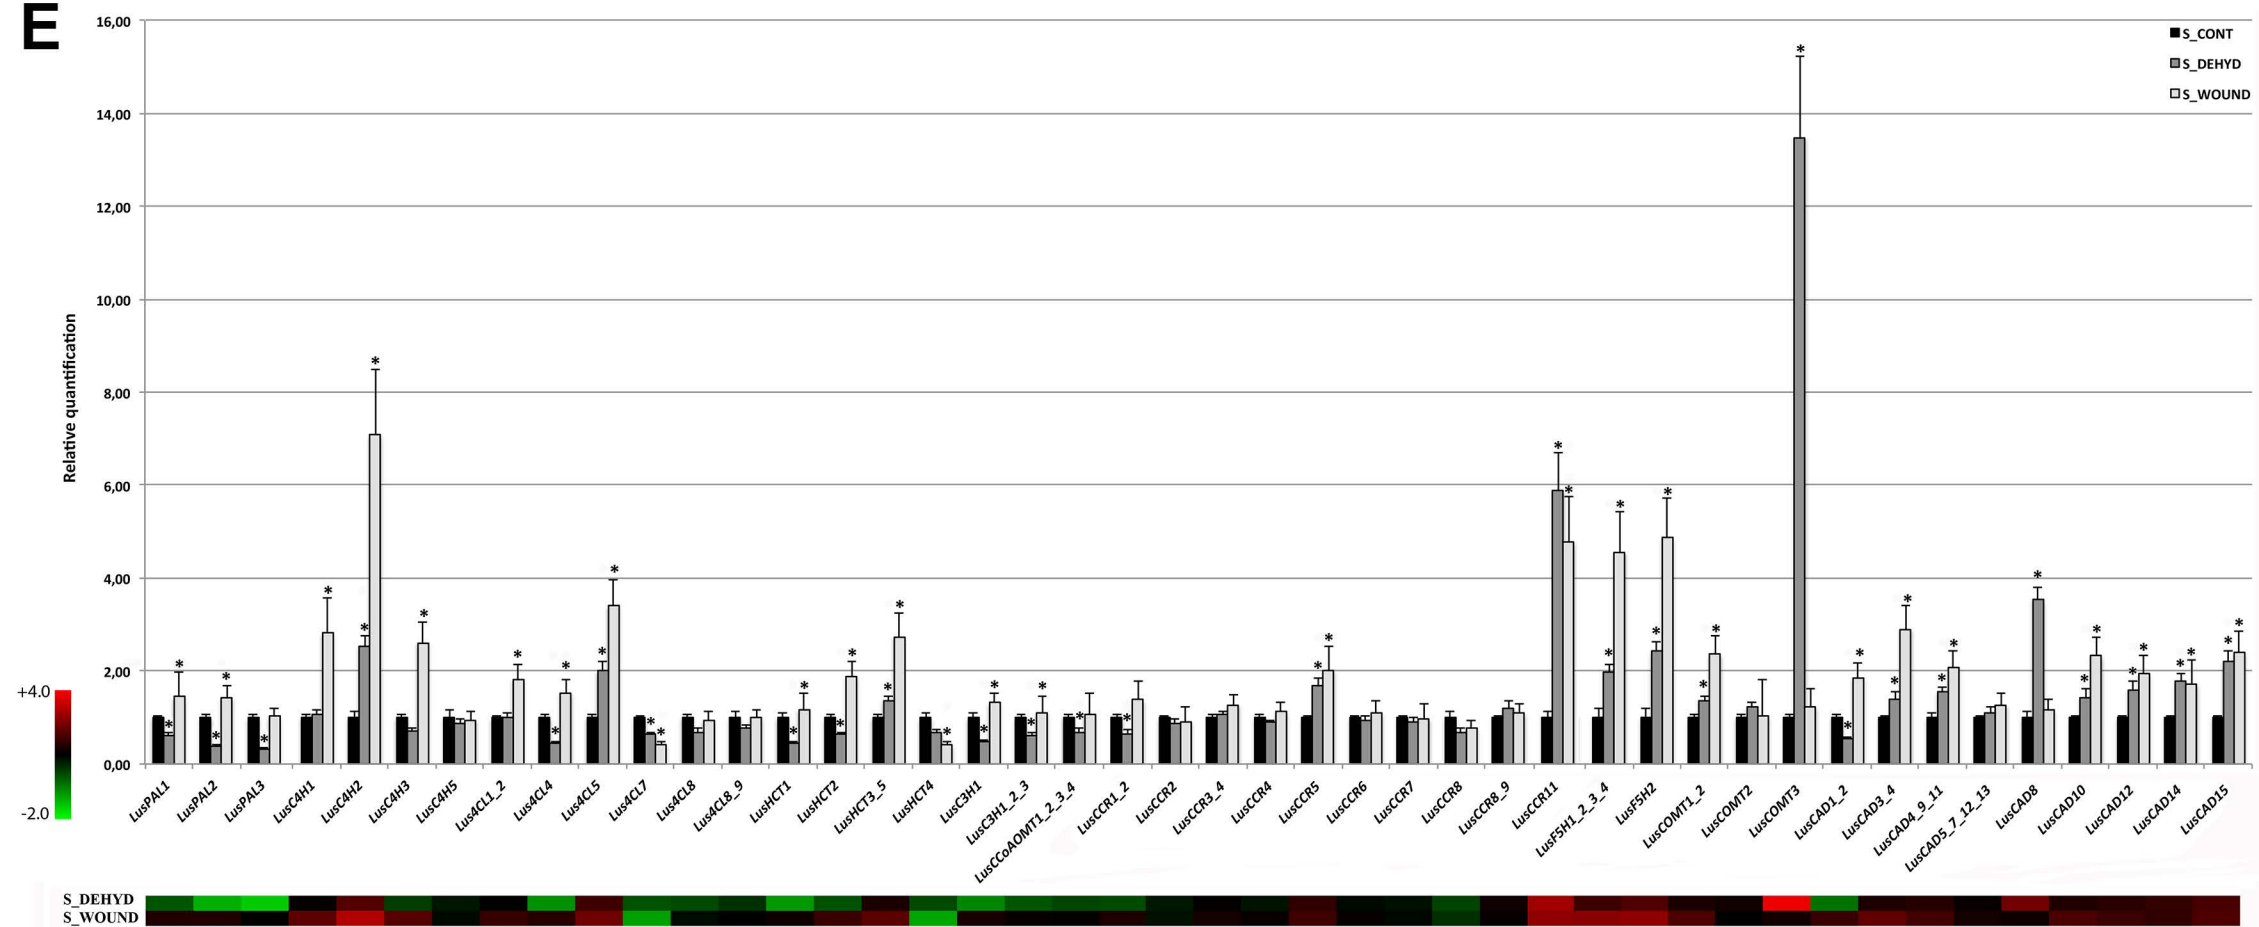

S\_DEHYD

S\_WOUND

F

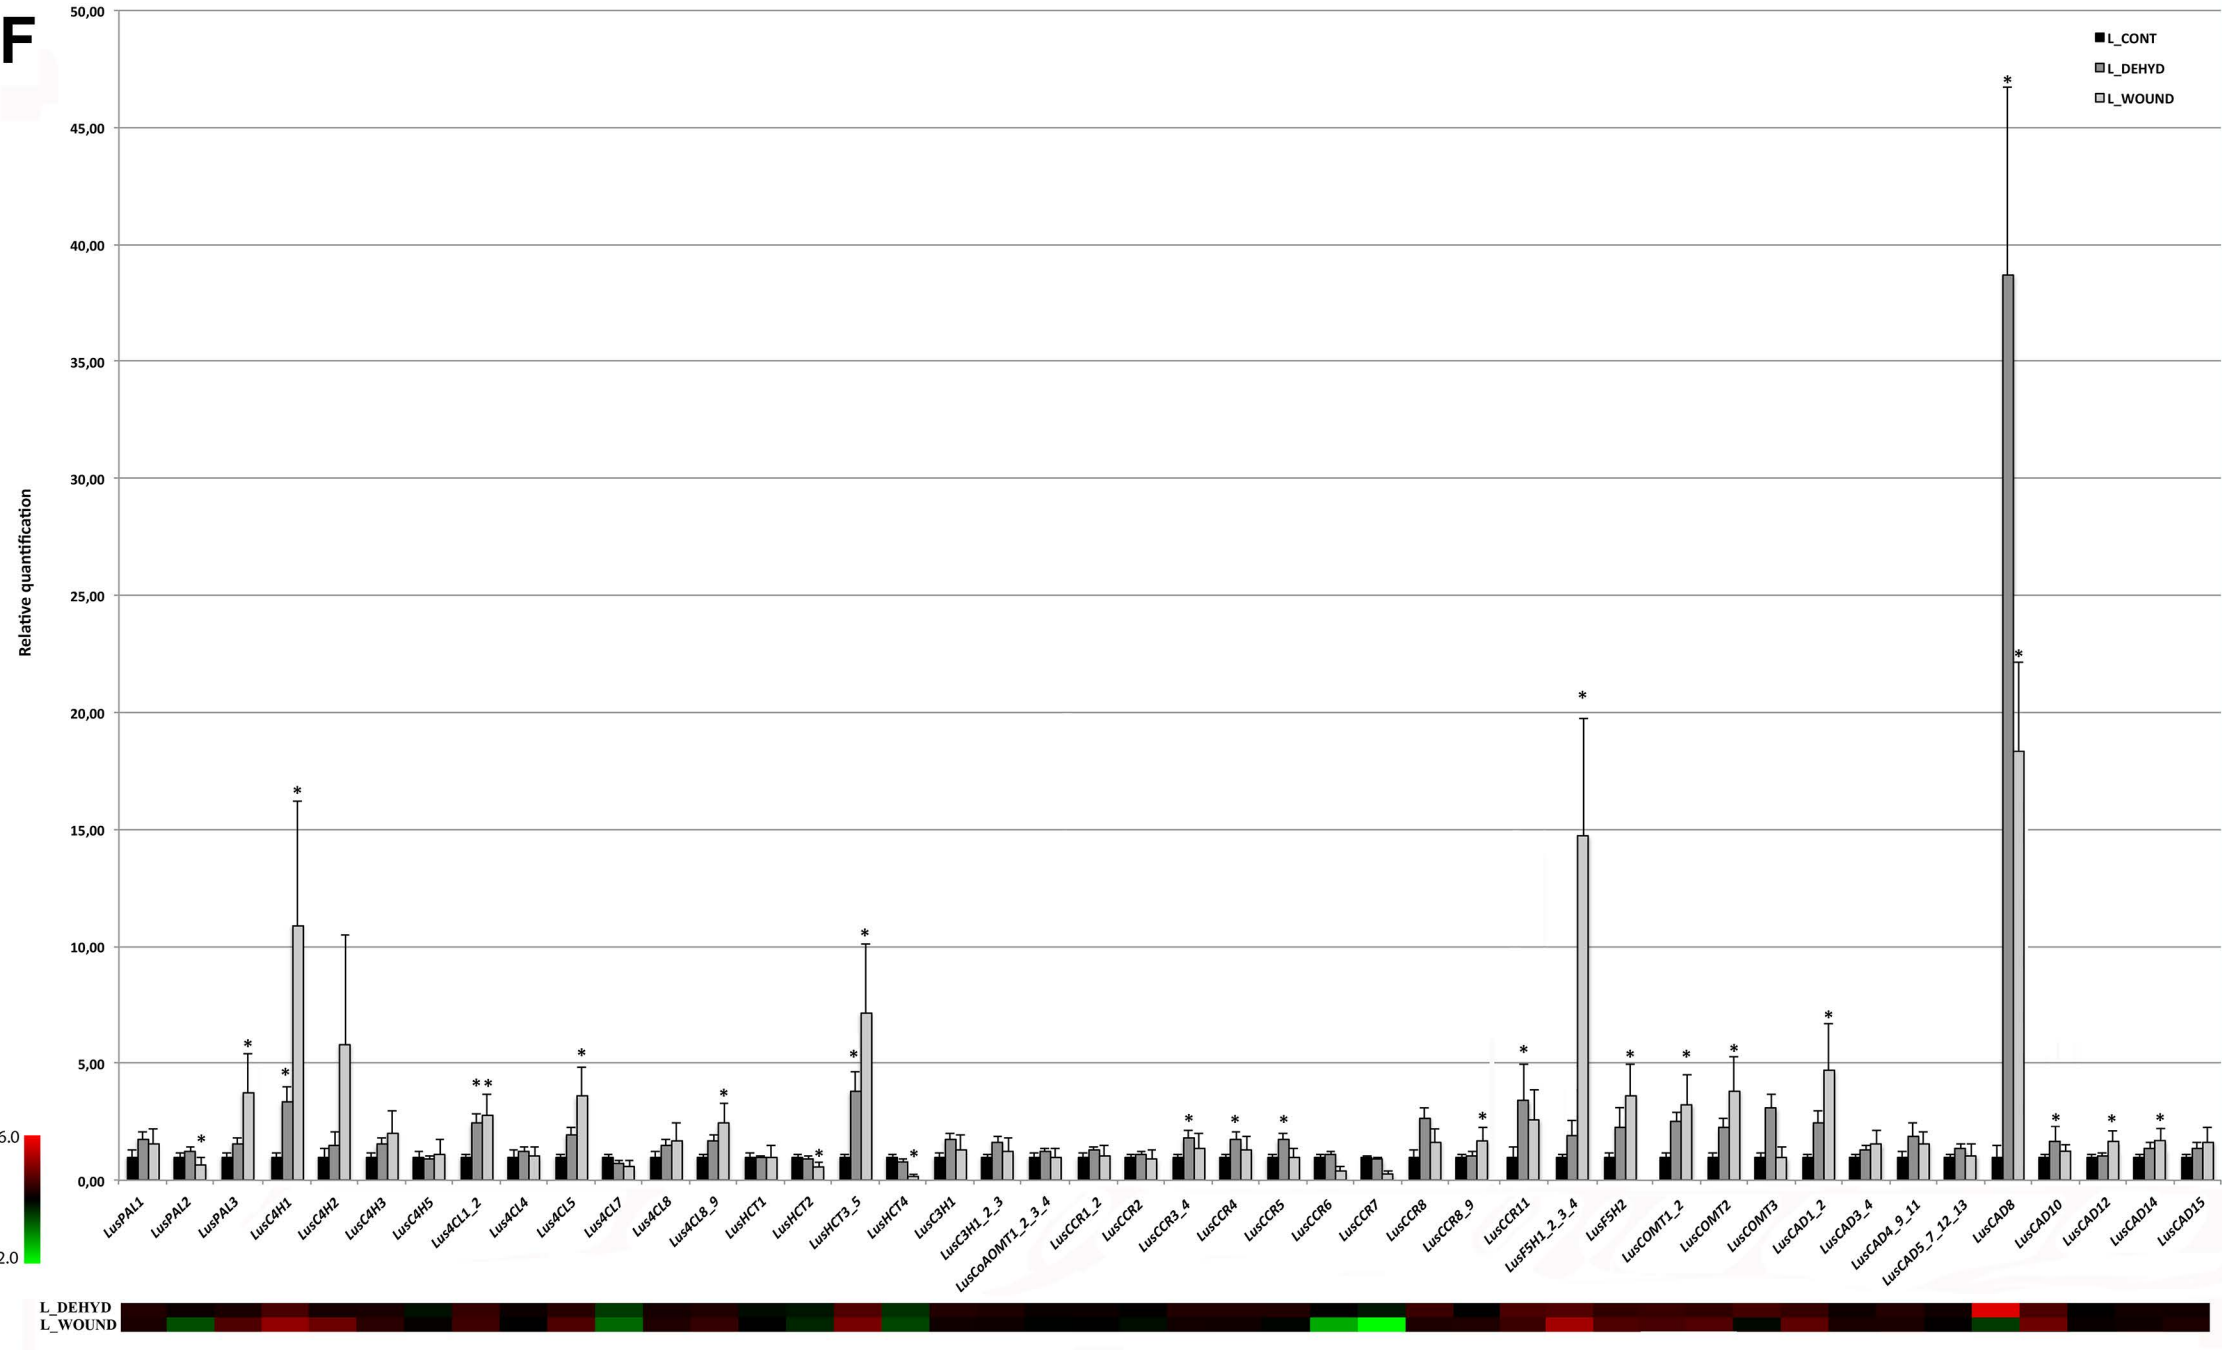

**G**

Relative quantification

+4.0  
0,00  
-3.0

■ 0H  
■ 48H  
□ 48H\_CL

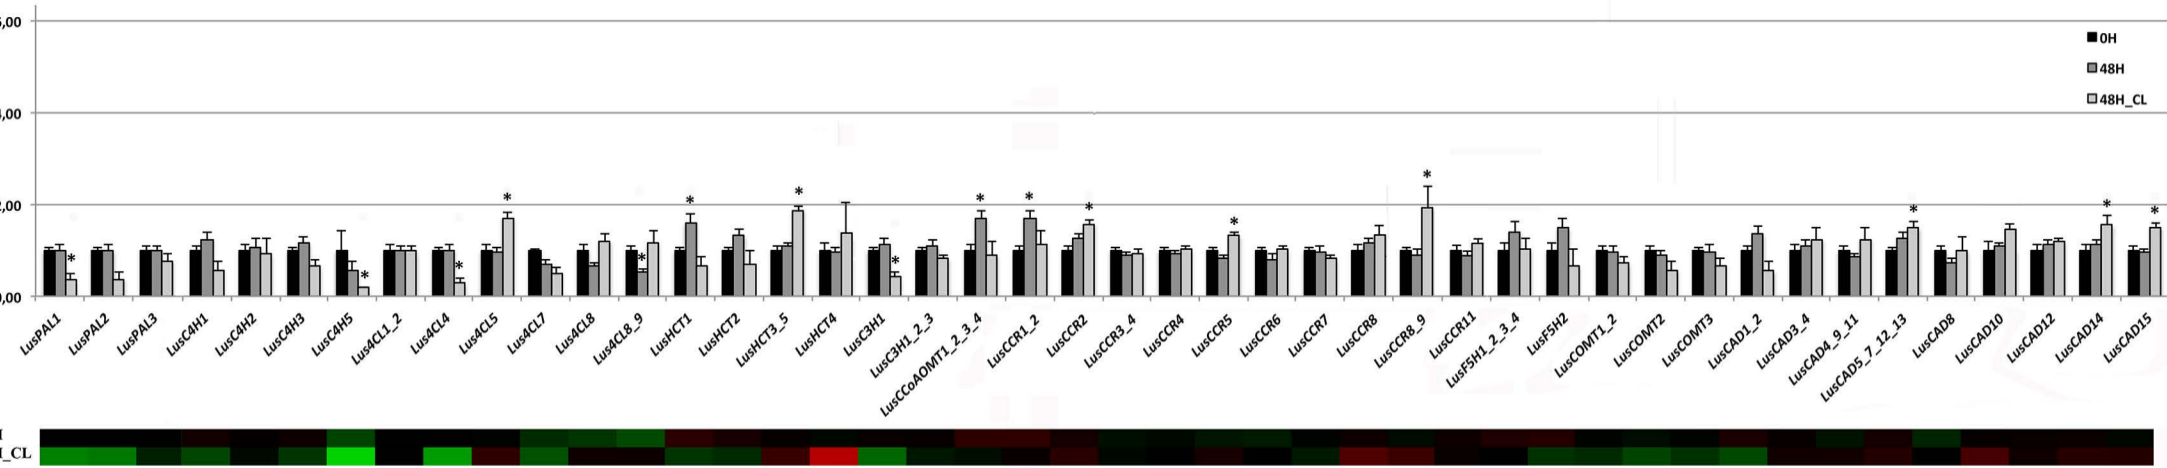48H  
48H\_CL
